# Supplementary material for: Molecular Characterization of Mutant Mouse Strains Generated from the EUCOMM/KOMP-CSD ES Cell Resource
Source: PubMed Central journal article supplement (PMC3745610; doi:10.1007/s00335-013-9467-x), 2013-08-04
Supplement: 335_2013_9467_MOESM1_ESM.pdf [file 335_2013_9467_MOESM1_ESM.pdf]

## Supplementary information

### S1 – Mouse QC tests

#### *Short Range PCR reagents and cycling conditions*

| Reagent                       | volume (ul) |
|-------------------------------|-------------|
| Gene specific Primer 1 (10uM) | 0.3         |
| Gene specific Primer 2 (10uM) | 0.3         |
| MgCl <sub>2</sub> (50mM)      | 0.45        |
| 10x Buffer                    | 1.5         |
| dNTP (100mM)                  | 0.15        |
| Taq*                          | 0.15        |
| ddH <sub>2</sub> O            | 11.15       |
| DNA                           | 1           |
| <b>Total</b>                  | <b>15</b>   |

\*Platinum Taq is used in the PCR reaction  
(Invitrogen)

#### PCR conditions (program name TA58)

- 1 94 °C 5 min
- 2 94 °C 30 sec
- 3 58 °C 30 sec
- 4 72 °C 45 sec
- 5 Go to '2' + 34 cycles
- 6 72 °C 5 min
- 7 12 °C forever

#### *qPCR reagents and cycling conditions*

| Reagent                      | Volume (ul) |
|------------------------------|-------------|
| 2x GTXpress buffer*          | 5           |
| 60x TaqMan assay             | 0.166       |
| ddH <sub>2</sub> O           | 3.334       |
| 20x endogenous probe (Tfrc)* | 0.5         |
| DNA                          | 1           |

\*Applied Biosystems

95°C 20sec } x1  
95°C 10sec }  
60°C 30sec } x35

#### *Loss of WT allele qPCR*

The wild type loss of allele (WT LoA) qPCR assay uses a hydrolysis probe assay to determine the copy number of the wild type allele in a sample. Homozygote mutants will show no amplification, heterozygotes one copy and wild type mice will show two copies when compared to a WT control. The assay is usually designed in the region of the genome deleted during the mutant allele design phase (between the U5 and U3 sequences) although some sequence flanking the cassette insertion point can be used if necessary.

Assays are usually designed to amplify a product of less than 100bp as this helps to attain maximum efficiency of the PCR reaction, which is important for the downstream analysis and subsequent copy number determination (Sanger uses the 2-ddCt method for analysis). The WT LoA qPCR assay is useful for detecting that the correct locus has been targeted - a mis-targeting or incorrect allele replacement event will not disrupt the assay binding site and mutants will therefore show no loss in copy number.

#### *Neo count qPCR*

The neo count qPCR assay uses a hydrolysis probe assay to determine the copy number of the Neo cassette in a sample. Homozygote mutants will show two copies of neo, heterozygotes one copy and wild type mice will show no amplification when compared to homozygote controls.

The neo count does not confirm the correct targeting of the allele, nor the gene identity. It can however be used as a QC tool to detect multiple insertion events or concatemers within the cassette.

*qPCR assays*

| Assay Name | F name      | F sequence                | R name      | R sequence            | Probe name  | Dye | Probe sequence               |
|------------|-------------|---------------------------|-------------|-----------------------|-------------|-----|------------------------------|
| LoxP       | 3LOXP_F     | GAGATGGCGCAACGCAATTAA     | 3LOXP_R     | GGCGAGCTCAGACCATAACTT | 3LOXP_M     | FAM | AATGTATGCTATACGAAGTTATC      |
| LacZ       | LacZ_F      | GGAGTGCGATCTTCTGAGG       | LacZ_R      | CGCATCGTAACCGTGCATC   | LacZ_M      | FAM | CGATACTGTCGTCGTCCCCTCAAACCTG |
| Neo        | Neo_F       | GGTGGAGAGGCTATTCGGC       | Neo_R       | GAACACGGCGGCATCAG     | Neo_M       | FAM | TGGGCACAACAGACAATCGGCTG      |
| 5_FRT      | 5FRT_QPCR_F | CGATACCACGATATCAACAAGTTTG | 5FRT_QPCR_R | GGGAAAGGGTTCGAAGTTCCT | 5FRT_QPCR_M | FAM | CGCCGGAACCGAA                |

*Short range PCR assays*

| Assay  | Forward primer | F sequence             | Reverse primer | R sequence           | Size (bp) | PCR  |
|--------|----------------|------------------------|----------------|----------------------|-----------|------|
| 5' FRT | 5FRT_F         | AGGCGCATAACGATACCACGAT | 5FRT_R         | CCACAACGGGTTCTTCTGTT | 204       | TA58 |
| LacZ   | LacZ_2_small_F | ATCACGACGCGCTGTATC     | LacZ_2_small_R | ACATCGGGCAAATAATATCG | 108       | TA58 |
| LoxP   | Floxed PNF     | ATCCGGGGGTACCGCGTCGAG  | Floxed LR      | ACTGATGGCGAGCTCAGACC | variable  | TA58 |

*Universal cassette primer used in mutant-specific PCR assay*

| Primer name | Sequence             |
|-------------|----------------------|
| CAS_R1_Term | TCGTGGTATCGTTATGCGCC |

### Targeting Vector Backbone Assay

Primers are designed to amplify sequences present only in the vector backbone. If a correct homologous recombination has occurred then no product should be amplified. If a product is detected it strongly suggests an incorrect targeting event or a multiple insertion event.

Not all vector primers will be present in all backbones – please refer to the tables below on which primers to use.

Please note that the absence of a product does not necessarily prove that the targeting is correct and this test should be used in conjunction with others to confirm the targeting.

| Primer | Sequence             |
|--------|----------------------|
| VF1_F  | CTCCTTTCGCTTCTTCCT   |
| VF1_R  | GCGAAAAACCGTCTATCAGG |
| VF2_F  | TTGATTTGGGTGATGGTTCA |
| VF2_R  | GAAATCGGCAACATCCCTTA |
| VF4_F  | GTAGCTGACATTCATCCGGG |
| VF4_R  | CTTTTCTACGGGGTCTGACG |
| VF5_F  | CGAACGACCTACACCGAACT |
| VF5_R  | AAAGATACCAGGCGTTTCCC |
| VF6_F  | CAGCATGCCTGCTATTGTCT |
| VF6_R  | TAGTTGCCAGCCATCTGTTG |
| VF7_F  | GTGGCGCTTCTCATAGCTC  |
| VF7_R  | GCCTACATACCTCGCTCTGC |
| VF8_F  | ATAATACCGCGCCACATAGC |
| VF8_R  | TTGCCTCCTGTTTTGCT    |

### Vector backbone primer combinations and different backbone types

| Vector                | VF1_F | VF1_R | VF2_F | VF2_R | VF4_F | VF4_R | VF5_F | VF5_R | VF6_F | VF6_R | VF7_F | VF7_R | VF8_F | VF8_R |
|-----------------------|-------|-------|-------|-------|-------|-------|-------|-------|-------|-------|-------|-------|-------|-------|
| L3L4_pZero_DTA_kan    | y     | y     | n     | n     | y     | y     | y     | y     | n     | n     | n     | n     | n     | n     |
| L3L4_pZero_kan        | y     | y     | y     | y     | y     | y     | y     | y     | n     | n     | n     | n     | n     | n     |
| L3L4_pD223_DTA_spec   | n     | n     | n     | n     | n     | y     | y     | y     | y     | y     | n     | n     | n     | n     |
| L3L4_pD223_DTA_T_spec | n     | n     | n     | n     | n     | y     | y     | y     | y     | y     | n     | n     | n     | n     |
| R3R4_pBR_DTA+_Bsd_amp | n     | n     | n     | n     | n     | n     | n     | n     | n     | n     | y     | y     | y     | y     |

### LoxP Confirmation

Confirmation of the loxP site downstream of the critical exon can be achieved by several methods. The primary method uses two universal primers to amplify across the critical exon region (Skarnes et al., 2011). Presence of a band (when accompanied by the proper controls) can be used as confirmation of the loxP site.

In some cases the region to be amplified may be too large for the standard PCR reaction, in which case a gene-specific primer can be used in conjunction with one of the universal primers or two gene specific primers can be used. The latter method will produce two bands of different sizes in heterozygotes, although this may be difficult to resolve on some gel systems.

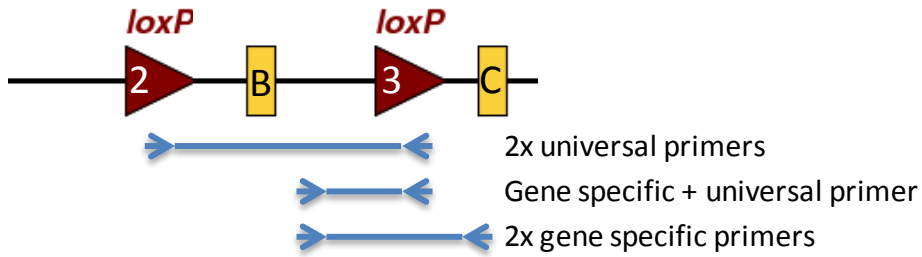

### Mutant Specific short range PCR

The mutant-specific srPCR amplifies a product in the mutant form of the allele. This can be used in conjunction with a wild-type specific assay to determine the genotype of the mouse. Homozygous mice will produce no amplification in the wild type assay shown below (detection of homozygotes by this method can also be used to confirm the targeting).

The mutant specific PCR on its own is not sufficient to confirm the correct targeting as the primer sites are within the homology arms of the construct. It can be used however to check the gene identity of the injected construct.

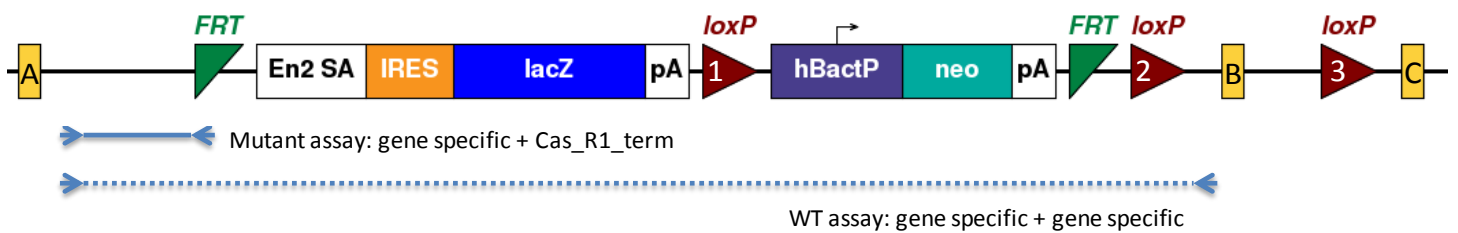

**S2. Cassette deletion in 2210012G02Rik shown by a PCR tile. *Spns2* is shown as a positive control**

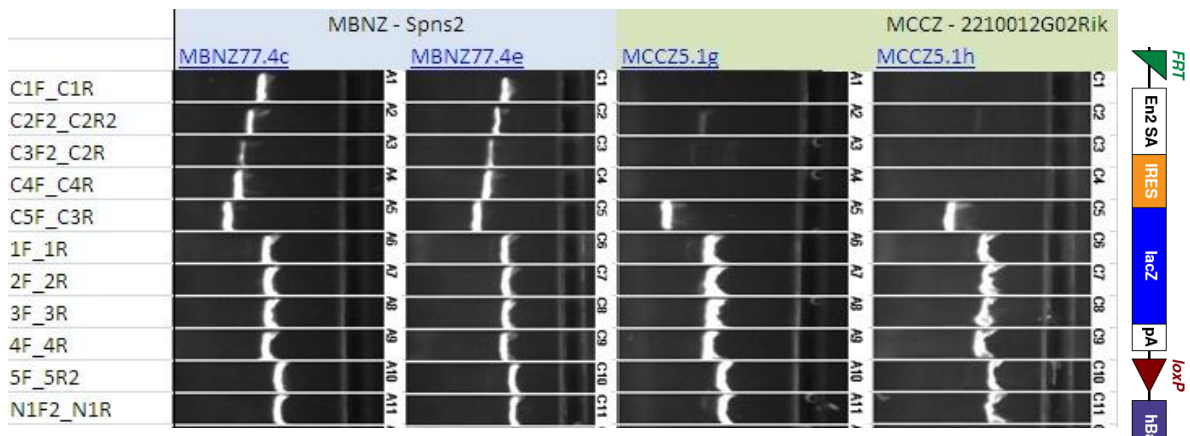

A PCR tiling path was designed across the L1L2\_Bact\_P cassette (Skarnes et al., 2011); deleted portions of the cassette are apparent by the lack of amplification of a band on a gel - in this example the 2210012G02Rik is missing the *En2* splice acceptor and the IRES element. The structure of the cassette is shown on the right hand side

**S3. Internal deletion of the *lacZ* cassette detected in *Btbd11* EPD0463\_1\_A11.**

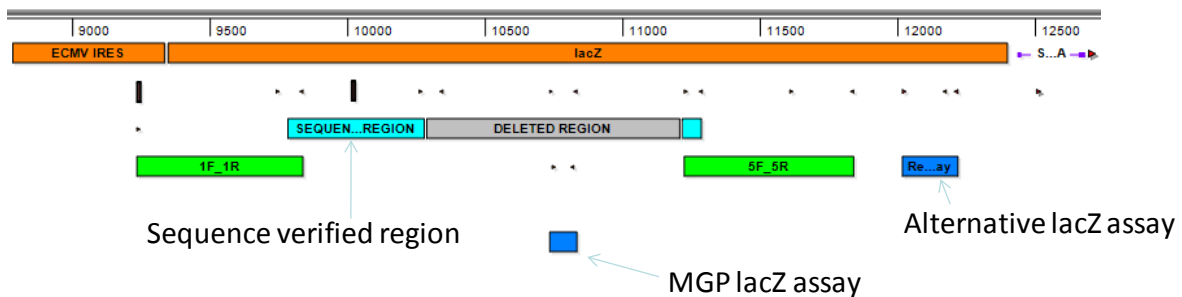

The internal cassette deletion was originally detected by a lack of amplification in the MGP *lacZ* assay and then confirmed by tiling-PCR and sequencing across the affected region. An alternative assay can be used for genotyping these mice if required.

The structure of the cassette is shown as orange bars at the top with the sequence-verified region of the *lacZ* in blue, and the confirmed deletion in grey. 1F\_1R and 5F\_5R represent amplicons flanking the deleted region.

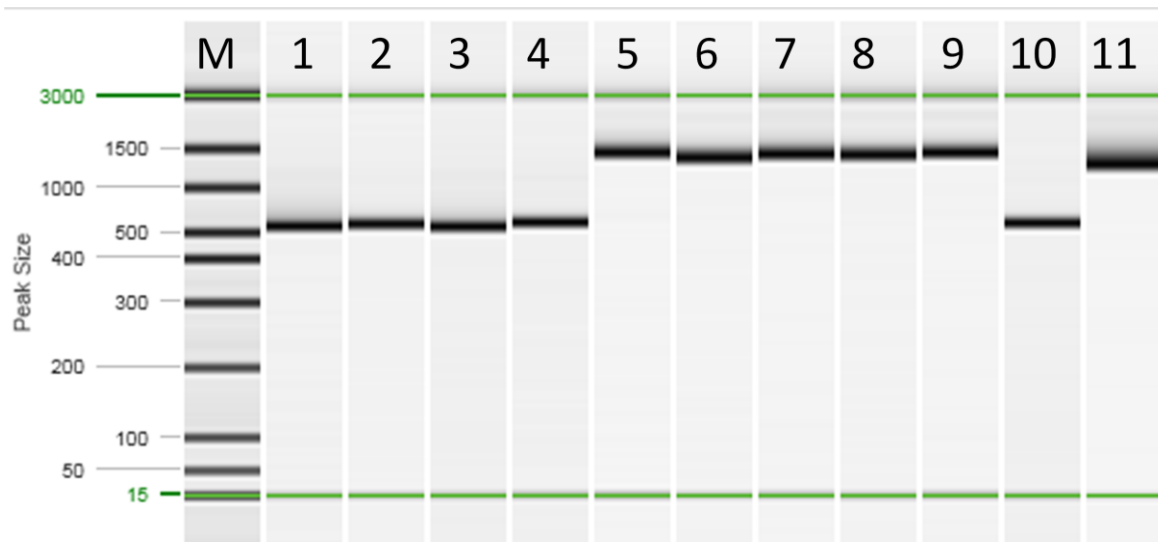

Gel image showing confirmation of the *lacZ* deletion using primers flanking the deleted area.

Lanes 1-4: MDAR *Btbd11*<sup>tm1a(EUCOMM)Wtsi</sup> mice possessing the *lacZ* deletion amplify a 630bp product

Lane 5: Positive control mouse

Lanes 6-10: Different ESC clones from *Btbd11* electroporation EPD0463. Only the clone EPD0463\_1\_A11 (lane 10) shows the deletion

Lane 11: Final vector PGRS0001\_B\_H11 DNA does not show a deletion and amplifies an expected product of 1.55kb

Lane M: size marker. Lane 7. Negative control.

The upper and lower green bands are alignment markers used by the fragment analysis software (Qiagen)

#### S4. QC issues detected in mouse colonies

*Tmem126a* targeting confirmation.

| Mouse ID    | WT | Mut | 5'FRT | LoxP | Loss of WT allele qPCR |
|-------------|----|-----|-------|------|------------------------|
| MEJS9.1a    |    |     |       |      | fail                   |
| MEJS9.1d    |    |     |       |      | fail                   |
| MEJS10.2a   |    |     |       |      | fail                   |
| MEJS7.1a    |    |     |       |      | pass                   |
| MEJS8.1a    |    |     |       |      | pass                   |
| MEJS8.1b    |    |     |       |      | pass                   |
| -ve control |    |     |       |      |                        |

*Tmem126a* shows different targeting events from the two founding chimeras. Results from four assays performed by srPCR (wildtype, mutant, 5' cassette and 3' *loxP* and visualised on a Qiagen

QIAxcel) and from the loss of WT allele qPCR are shown. The upper and lower bands are alignment markers used by the fragment analysis software (Qiagen)

G<sub>1</sub> mice MEJS9.1a,9.1d and 10.2a (highlighted red) show no amplification of the 5' end of the cassette, no amplification of the mutant-specific PCR (indicating that a deletion of the 5' end of the cassette has occurred) and a targeting QC fail in the WT loss of allele qPCR. Mice MEJS7.1a, 8.1a and 8.1b (highlighted green) show correct cassette structure and correct targeting

#### *Srrm4* targeting confirmation

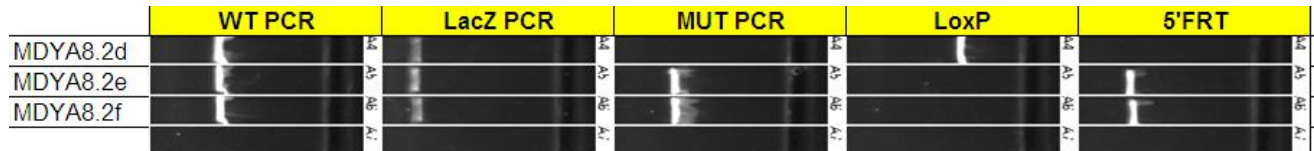

G<sub>1</sub> siblings containing a mixture of different gene targeting events in *Srrm4* (EPD0538\_3\_A07). MDYA 8.2e and 8.2f show the expected cassette structure (wildtype, lacZ, 5' cassette and mutant-specific assays all amplify a band) but the 3' *loxP* assay fails, indicating that this is a tm1e targeted non-conditional strain. MDYA8.2d shows a possible deletion of the 5' end of the cassette (mutant-specific and 5' cassette assays fail) but does amplify a *loxP* product.

#### 55. Mixed ESC populations per cell line

Based on ESC clones which passed an additional long range PCR step prior to micro-injection but then later failed QC as mouse strains.

| Cell line    | QC fail   | QC pass    | Total strains | % QC fail    |
|--------------|-----------|------------|---------------|--------------|
| JM8.F6       | 2         | 57         | 59            | 3.4%         |
| JM8.N4       | 12        | 113        | 125           | 9.6%         |
| JM8A1.N3     | 11        | 29         | 40            | 27.5%        |
| JM8A3.N1     | 35        | 173        | 208           | 16.8%        |
| <b>Total</b> | <b>60</b> | <b>372</b> | <b>432</b>    | <b>13.9%</b> |

#### References

Skarnes, W. C., Rosen, B., West, A. P., Koutourakis, M., Bushell, W., Iyer, V., Mujica, A. O., et al. (2011). A conditional knockout resource for the genome-wide study of mouse gene function. *Nature*, 474(7351), 337–42. doi:10.1038/nature10163
